# Supplementary material for: Analysing avian eggshell pigments with Raman spectroscopy
Source: Oxford University Press journal article supplement (doi:10.1242/jeb.124917), 2015-01-01
Supplement: jeb124917supp.pdf [file jeb124917supp.pdf]

## **Table S1**

[Click here to Download Table S1](#)
